# Supplementary material
Source: PubMed Central journal article supplement (PMC3251235)
Supplement: supp_blood-2011-04-347872_TableS1.pdf [file supp_blood-2011-04-347872_TableS1.pdf]

|                                                             | No.    | 1-year RS |             | 5-year RS |             |
|-------------------------------------------------------------|--------|-----------|-------------|-----------|-------------|
|                                                             |        | %         | (95% CI)    | %         | (95% CI)    |
| <b>Acute myeloid leukemia (AML)<sup>†</sup></b>             | 13,230 | 43.0      | (42.2–43.9) | 25.4      | (24.4–26.3) |
| <1 years                                                    | 131    | 72.8      | (64.2–79.7) | 55.9      | (44.9–65.5) |
| 1–4 years                                                   | 255    | 82.6      | (77.3–86.8) | 64.7      | (57.7–70.9) |
| 5–19 years                                                  | 671    | 78.9      | (75.6–81.8) | 57.3      | (52.9–61.4) |
| 20–39 years                                                 | 1,458  | 74.2      | (71.8–76.3) | 51.0      | (48.1–53.9) |
| 40–49 years                                                 | 1,352  | 63.1      | (60.5–65.7) | 41.2      | (38.2–44.2) |
| 50–59 years                                                 | 1,875  | 52.9      | (50.6–55.1) | 27.7      | (25.3–30.2) |
| 60–69 years                                                 | 2,243  | 41.1      | (39.0–43.1) | 14.6      | (12.9–16.5) |
| 70–79 years                                                 | 2,870  | 22.7      | (21.2–24.3) | 6.0       | (4.9–7.3)   |
| ≥80 years                                                   | 2,375  | 11.2      | (9.9–12.6)  | 1.4       | (0.7–2.4)   |
| <b>Subtype and age</b>                                      |        |           |             |           |             |
| <b>Group 1</b>                                              | 10,890 | 39.6      | (38.7–40.6) | 21.1      | (20.2–22.1) |
| AML, NOS; [M-9861]                                          |        |           |             |           |             |
| <1 years                                                    | 41     | 80.8      | (64.9–90.1) | 56.4      | (37.7–71.4) |
| 1–4 years                                                   | 85     | 81.1      | (70.9–87.9) | 64.6      | (52.6–74.2) |
| 5–19 years                                                  | 190    | 72.9      | (65.9–78.7) | 47.2      | (38.6–55.3) |
| 20–39 years                                                 | 463    | 71.2      | (66.8–75.1) | 43.4      | (38.0–48.6) |
| 40–59 years                                                 | 1,220  | 52.5      | (49.6–55.3) | 26.3      | (23.4–29.2) |
| ≥60 years                                                   | 3,758  | 21.3      | (20.0–22.7) | 6.0       | (5.0–7.1)   |
| AML with minimal differentiation; (FAB M0) [M-9872]         |        |           |             |           |             |
| <20 years                                                   | 57     | 76.6      | (63.0–85.7) | 38.0      | (22.7–53.2) |
| 20–39 years                                                 | 55     | 68.7      | (54.5–79.3) | 32.2      | (19.2–46.0) |
| 40–59 years                                                 | 122    | 55.0      | (45.7–63.4) | 29.5      | (21.2–38.3) |
| ≥60 years                                                   | 332    | 22.4      | (18.0–27.2) | 7.9       | (4.6–12.3)  |
| AML without maturation; (FAB M1) [M-9873]                   |        |           |             |           |             |
| <20 years                                                   | 46     | 73.9      | (58.7–84.3) | 56.1      | (39.6–69.6) |
| 20–39 years                                                 | 107    | 75.6      | (66.2–82.7) | 49.2      | (38.1–59.3) |
| 40–59 years                                                 | 229    | 59.2      | (52.5–65.3) | 32.6      | (25.7–39.6) |
| ≥60 years                                                   | 397    | 28.3      | (23.8–32.9) | 5.6       | (2.9–9.4)   |
| AML with maturation; (FAB M2) [M-9874]                      |        |           |             |           |             |
| <20 years                                                   | 91     | 81.1      | (71.4–87.8) | 63.4      | (51.9–72.8) |
| 20–39 years                                                 | 78     | 75.7      | (64.6–83.8) | 53.8      | (41.1–64.8) |
| 40–59 years                                                 | 236    | 60.6      | (54.0–66.6) | 33.6      | (27.0–40.4) |
| ≥60 years                                                   | 498    | 28.7      | (24.6–32.9) | 9.0       | (5.9–12.8)  |
| Acute myelomonocytic leukemia; (FAB M4) [M-9867]            |        |           |             |           |             |
| <20 years                                                   | 107    | 74.8      | (65.5–82.0) | 50.1      | (38.3–60.7) |
| 20–39 years                                                 | 144    | 75.5      | (67.5–81.7) | 44.1      | (34.3–53.4) |
| 40–59 years                                                 | 339    | 54.9      | (49.4–60.0) | 31.2      | (25.5–37.0) |
| ≥60 years                                                   | 690    | 24.9      | (21.6–28.3) | 5.5       | (3.4–8.3)   |
| Acute monoblastic and monocytic leukemia; (FAB M5) [M-9891] |        |           |             |           |             |
| <20 years                                                   | 123    | 74.1      | (65.4–81.0) | 57.8      | (47.3–67.0) |
| 20–39 years                                                 | 118    | 63.6      | (54.2–71.6) | 36.6      | (27.2–46.0) |
| 40–59 years                                                 | 280    | 52.3      | (46.3–58.0) | 30.2      | (24.4–36.2) |
| ≥60 years                                                   | 481    | 21.3      | (17.7–25.2) | 7.8       | (4.9–11.5)  |
| Acute erythroid leukemia; (FAB M6) [M-9840]                 |        |           |             |           |             |
| <20 years                                                   | 11     | ~         |             | ~         |             |
| 20–39 years                                                 | 27     | 59.3      | (38.7–75.1) | 29.8      | (13.1–48.7) |
| 40–59 years                                                 | 53     | 45.5      | (31.8–58.3) | 7.5       | (0.9–24.1)  |
| ≥60 years                                                   | 130    | 19.3      | (12.9–26.8) | 4.6       | (1.3–11.4)  |
| Acute megakaryoblastic leukemia; (FAB M7) [M-9910]          |        |           |             |           |             |
| <20 years                                                   | 83     | 79.5      | (69.0–86.8) | 63.0      | (50.4–73.2) |
| 20–39 years                                                 | 7      | ~         |             | ~         |             |
| 40–59 years                                                 | 23     | ~         |             | ~         |             |
| ≥60 years                                                   | 51     | 16.4      | (7.6–28.0)  | ~         |             |

|                                                                                | No.          | 1-year RS   |                    | 5-year RS   |                    |
|--------------------------------------------------------------------------------|--------------|-------------|--------------------|-------------|--------------------|
|                                                                                |              | %           | (95% CI)           | %           | (95% CI)           |
| Acute basophilic leukemia; [M-9870]                                            |              |             |                    |             |                    |
| <20 years                                                                      | 0            | ~           |                    | ~           |                    |
| 20–39 years                                                                    | 0            | ~           |                    | ~           |                    |
| 40–59 years                                                                    | 2            | ~           |                    | ~           |                    |
| ≥60 years                                                                      | 2            | ~           |                    | ~           |                    |
| Acute panmyelosis; [M-9931]                                                    |              |             |                    |             |                    |
| <20 years                                                                      | 2            | ~           |                    | ~           |                    |
| 20–39 years                                                                    | 6            | ~           |                    | ~           |                    |
| 40–59 years                                                                    | 24           | ~           |                    | ~           |                    |
| ≥60 years                                                                      | 66           | 64.5        | (51.0–75.1)        | 26.9        | (14.7–40.6)        |
| Myeloid sarcoma; [M-9930]                                                      |              |             |                    |             |                    |
| <20 years                                                                      | 11           | ~           |                    | ~           |                    |
| 20–39 years                                                                    | 15           | ~           |                    | ~           |                    |
| 40–59 years                                                                    | 37           | 65.1        | (47.5–78.1)        | 51.9        | (33.1–67.8)        |
| ≥60 years                                                                      | 53           | 25.5        | (14.5–38.1)        | 13.3        | (5.3–25.1)         |
| <b>Group 2</b>                                                                 | <b>1,478</b> | <b>69.5</b> | <b>(67.0–71.8)</b> | <b>60.8</b> | <b>(57.9–63.6)</b> |
| AML with t(8;21); (FAB M2, t(8;21)) [M-9896]                                   |              |             |                    |             |                    |
| <20 years                                                                      | 31           | 93.5        | (76.4–98.4)        | 79.2        | (59.3–90.1)        |
| 20–39 years                                                                    | 45           | 73.4        | (57.9–84.0)        | 49.4        | (32.9–63.9)        |
| 40–59 years                                                                    | 65           | 68.0        | (55.1–77.9)        | 41.4        | (28.4–54.0)        |
| ≥60 years                                                                      | 79           | 38.2        | (27.2–49.0)        | 18.5        | (9.2–30.3)         |
| AML with abnormal marrow eosinophils; inv(16) or t(16;16); (FAB M4Eo) [M-9871] |              |             |                    |             |                    |
| <20 years                                                                      | 17           | ~           |                    | ~           |                    |
| 20–39 years                                                                    | 39           | 79.3        | (62.8–89.1)        | 74.1        | (57.1–85.2)        |
| 40–59 years                                                                    | 48           | 83.6        | (69.5–91.6)        | 58.1        | (39.4–72.9)        |
| ≥60 years                                                                      | 34           | 41.6        | (24.6–57.8)        | 32.4        | (15.3–50.8)        |
| APL with t(15;17); (FAB M3) [M-9866]                                           |              |             |                    |             |                    |
| <20 years                                                                      | 133          | 85.7        | (78.5–90.7)        | 76.0        | (66.5–83.2)        |
| 20–39 years                                                                    | 303          | 83.2        | (78.5–87.0)        | 77.2        | (71.5–81.9)        |
| 40–59 years                                                                    | 364          | 73.1        | (68.2–77.4)        | 67.9        | (62.3–72.8)        |
| ≥60 years                                                                      | 248          | 45.8        | (39.3–52.1)        | 42.5        | (35.5–49.3)        |
| AML, 11q23 abnormalities; [M-9897]                                             |              |             |                    |             |                    |
| <20 years                                                                      | 11           | ~           |                    | ~           |                    |
| 20–39 years                                                                    | 11           | ~           |                    | ~           |                    |
| 40–59 years                                                                    | 12           | ~           |                    | ~           |                    |
| ≥60 years                                                                      | 38           | 44.0        | (27.5–59.4)        | ~           |                    |
| <b>Group 3</b>                                                                 | <b>862</b>   | <b>39.7</b> | <b>(36.4–43.1)</b> | <b>13.3</b> | <b>(10.5–16.5)</b> |
| AML with myelodysplasia-related changes; [M-9895]                              |              |             |                    |             |                    |
| <20 years                                                                      | 15           | ~           |                    | ~           |                    |
| 20–39 years                                                                    | 33           | 84.9        | (67.4–93.5)        | 47.6        | (28.8–64.1)        |
| 40–59 years                                                                    | 161          | 53.4        | (45.4–60.8)        | 23.2        | (16.3–30.8)        |
| ≥60 years                                                                      | 573          | 27.8        | (24.1–31.7)        | 5.2         | (3.2–7.9)          |
| Therapy-related myeloid neoplasms; [M-9920, 9987]                              |              |             |                    |             |                    |
| <20 years                                                                      | 3            | ~           |                    | ~           |                    |
| 20–39 years                                                                    | 7            | ~           |                    | ~           |                    |
| 40–59 years                                                                    | 12           | ~           |                    | ~           |                    |
| ≥60 years                                                                      | 58           | 67.1        | (52.2–78.3)        | 12.6        | (2.5–31.4)         |

|                                                                             | No.   | 1-year RS |             | 5-year RS |             |
|-----------------------------------------------------------------------------|-------|-----------|-------------|-----------|-------------|
|                                                                             |       | %         | (95% CI)    | %         | (95% CI)    |
| <b>Precursor lymphoblastic leukemia/lymphoma (ALL/L)<sup>††</sup></b>       | 7,395 | 83.3      | (82.5–84.2) | 64.9      | (63.6–66.2) |
| <1 years                                                                    | 132   | 80.1      | (72.0–86.0) | 58.2      | (48.1–67.0) |
| 1–4 years                                                                   | 1,984 | 98.3      | (97.6–98.7) | 91.2      | (89.5–92.7) |
| 5–19 years                                                                  | 2,528 | 93.8      | (92.7–94.6) | 80.5      | (78.6–82.2) |
| 20–39 years                                                                 | 1,090 | 77.8      | (75.2–80.2) | 41.7      | (38.0–45.2) |
| 40–49 years                                                                 | 474   | 67.5      | (63.0–71.5) | 29.3      | (24.3–34.5) |
| 50–59 years                                                                 | 447   | 59.8      | (55.0–64.2) | 22.5      | (18.0–27.3) |
| 60–69 years                                                                 | 330   | 50.1      | (44.5–55.5) | 17.0      | (12.1–22.6) |
| 70–79 years                                                                 | 262   | 34.8      | (28.9–40.7) | 10.2      | (6.2–15.4)  |
| ≥80 years                                                                   | 148   | 20.1      | (13.7–27.3) | 3.6       | (0.8–10.1)  |
| <b>Subtype and age</b>                                                      |       |           |             |           |             |
| B-cell lymphoblastic leukemia/lymphoma;<br>[M-9727(B), 9728, 9835(B), 9836] |       |           |             |           |             |
| <1 years                                                                    | 94    | 81.4      | (71.7–88.0) | 54.3      | (41.6–65.4) |
| 1–4 years                                                                   | 1,504 | 98.7      | (98.0–99.2) | 91.8      | (89.7–93.5) |
| 5–19 years                                                                  | 1,569 | 95.3      | (94.2–96.3) | 82.7      | (80.4–84.9) |
| 20–39 years                                                                 | 674   | 78.5      | (75.2–81.5) | 38.2      | (33.5–42.9) |
| 40–59 years                                                                 | 638   | 64.9      | (61.0–68.4) | 23.7      | (19.7–28.0) |
| ≥60 years                                                                   | 452   | 40.4      | (35.7–45.0) | 11.4      | (7.9–15.7)  |
| T-cell lymphoblastic leukemia/lymphoma;<br>[M-9727(T), 9729, 9835(T), 9837] |       |           |             |           |             |
| <1 years                                                                    | 4     | ~         |             | ~         |             |
| 1–4 years                                                                   | 99    | 93.9      | (87.0–97.2) | 77.6      | (66.6–85.4) |
| 5–19 years                                                                  | 520   | 89.2      | (86.2–91.6) | 72.8      | (68.2–76.8) |
| 20–39 years                                                                 | 286   | 80.1      | (74.9–84.3) | 49.0      | (41.7–55.8) |
| 40–59 years                                                                 | 159   | 67.0      | (59.0–73.7) | 38.7      | (30.5–46.8) |
| ≥60 years                                                                   | 78    | 46.8      | (34.9–57.8) | 20.2      | (10.1–32.8) |
| Lymphoblastic leukemia/lymphoma, unknown lineage;<br>[M-9727(U), 9835(U)]   |       |           |             |           |             |
| <1 years                                                                    | 34    | 76.9      | (58.6–87.9) | 63.8      | (44.7–77.9) |
| 1–4 years                                                                   | 381   | 97.7      | (95.5–98.8) | 92.4      | (88.6–95.0) |
| 5–19 years                                                                  | 439   | 93.4      | (90.6–95.4) | 81.4      | (76.9–85.1) |
| 20–39 years                                                                 | 130   | 69.1      | (60.2–76.4) | 40.0      | (30.9–49.0) |
| 40–59 years                                                                 | 124   | 54.0      | (44.7–62.3) | 20.7      | (12.6–30.3) |
| ≥60 years                                                                   | 210   | 33.3      | (26.8–39.9) | 12.5      | (7.6–18.7)  |
| <b>Acute leukemia of ambiguous lineage<sup>†</sup></b>                      | 714   | 26.2      | (22.9–29.6) | 16.8      | (13.3–20.5) |
| <b>Subtype and age</b>                                                      |       |           |             |           |             |
| Acute undifferentiated leukemia; [M-9801]                                   |       |           |             |           |             |
| <20 years                                                                   | 48    | 76.8      | (62.0–86.5) | 60.4      | (43.1–73.9) |
| 20–39 years                                                                 | 45    | 55.0      | (39.3–68.2) | 33.7      | (18.4–49.7) |
| 40–59 years                                                                 | 65    | 29.4      | (18.9–40.7) | 15.9      | (7.9–26.3)  |
| ≥60 years                                                                   | 425   | 10.9      | (8.0–14.2)  | 3.0       | (1.3–5.9)   |
| Acute biphenotypic leukemia; [M-9805]                                       |       |           |             |           |             |
| <20 years                                                                   | 37    | 64.9      | (47.3–77.9) | 50.4      | (31.9–66.3) |
| 20–39 years                                                                 | 16    | ~         |             | ~         |             |
| 40–59 years                                                                 | 36    | 50.2      | (33.1–65.2) | 27.2      | (11.9–45.2) |
| ≥60 years                                                                   | 42    | 7.5       | (1.9–18.2)  | 0.0       |             |

Abbreviations: SEER-17, 17 cancer registry areas of the Surveillance, Epidemiology and End Results Program; No., number; RS, relative survival; CI, confidence interval; ~ relative survival not calculated for <25 cases or for insufficient number of individuals available for follow-up; NOS, not otherwise specified; FAB, French-American-British classification; APL, acute promyelocytic leukemia; (B), B-cell immunophenotype; (T) cell immunophenotype; (U), immunophenotype not specified.

<sup>†</sup> Includes all International Classification of Diseases for Oncology, third edition (ICD-O-3) morphology codes specified within the respective subtype categories. ICD-0-3 codes are specified within brackets.

<sup>††</sup> Includes B-cell lymphoblastic leukemia (n=4,730; 5-year RS 66.0%, 95% CI (64.4%-67.7%)); B-cell lymphoblastic lymphoma (n=201; 5-year RS 58.8%, 95% CI (49.9%-66.6%)); T-cell lymphoblastic leukemia (n=677; 5-year RS 60.3%, 95% CI (56.0%-64.3%)); T-cell lymphoblastic lymphoma (n=469; 5-year RS 59.2%, 95% CI (53.8%-64.2%)); lymphoblastic leukemia, unknown lineage (n=1,280; 5-year RS 65.9%, 95% CI (62.8%-68.7%)); lymphoblastic lymphoma, unknown lineage (n=38; 5-year RS 58.2%, 95% CI (39.8%-72.7%)).
